# Supplementary material
Source: MDPI journal article supplement (https://www.mdpi.com/2673-4672/1/2/7)
Supplement: s1 [file s1]

# **Model-based analysis of the link between groundwater table rising and the formation of solute plumes in a shallow stratified aquifer**

Simone Varisco<sup>1</sup>, Giovanni Pietro Beretta<sup>1</sup>, Luca Raffaelli<sup>2</sup>, Paola Raimondi<sup>3</sup>, Daniele Pedretti<sup>1,\*</sup>

<sup>1</sup> Dipartimento di Scienze della Terra “A. Desio”, Università degli Studi di Milano, 20133, Milan, Italy

([simone.varisco17@gmail.com](mailto:simone.varisco17@gmail.com), [giovanni.beretta@unimi.it](mailto:giovanni.beretta@unimi.it), [daniele.pedretti@unimi.it](mailto:daniele.pedretti@unimi.it))

<sup>2</sup> Consultant, via F. Baracca 2, Barlassina (MB), Italy ([info@studioraffaelli.it](mailto:info@studioraffaelli.it))

<sup>3</sup> Consultant, via Don Gnocchi 8, Lierna (LC), Italy ([paolinaraimondi@gmail.com](mailto:paolinaraimondi@gmail.com))

\* corresponding author

## **Contents**

|   |                                                            |    |
|---|------------------------------------------------------------|----|
| 1 | Additional information on the geological background .....  | 2  |
| 2 | Stratigraphic cross-sections of the contaminated site..... | 3  |
| 3 | Interpolated surfaces of the model layers.....             | 8  |
| 4 | Time-dependent constant-head boundary conditions.....      | 9  |
| 5 | Pumping rates used in the numerical model.....             | 10 |
| 6 | Calibration plots and sensitivity analysis .....           | 11 |

# 1 Additional information on the geological background

Three main geological units characterize the area: the subsystema of Agro Nocerino Sarnese (VEF2b), the Casalnuovo Casoria Unit ("Unità di Casalnuovo Casoria", UCC), and the Campanian Ignimbrite ("Ignimbrite Campana", IC).

The VEF2b lies between the current ground surface and the erosion and/or non-deposition surface that affects the top of the IC. It includes the distal and intermediate pyroclastic deposits of the Mt. Vesuvius and the Phlegraean Fields and the alluvial sediments deposited by a local river (river Sebeto). The VEF2b deposits have highly variable textures, which include centimetric-scale alternations of volcano-clastic silt mixed with sandy-silt of flood plains and muddy levels associated with marshy environment. Peat layers were also occasionally identified. The average thickness of the VEF2b ranges between 1-2m in the study area.

The UCC includes pyroclastic deposits covering a time interval between the deposition of the IC and the eruption of Avellino (between 39 and 3.8 thousand years ago). It is characterized by a white and gray highly laminated tuff in the lower part, with interlayers of white pumice levels. In the upper part of the UCC, a level of pumice immersed in a yellowish matrix of ash-fall deposits is sometimes found. The UCC base often rests on a brown paleosol that develops on the topsoil of the IC and/or on alluvial and/or colluvial deposits. The UCC has a variable thickness between a few cm up to 2 m in the study area.

The IC consists of pyroclasts, mostly ignimbrite deposits, deposited some 39 thousand years ago. It formed as a consequence of the major eruption that took place in the former caldera of the Phlegraean Fields, located 20 km west of Mt. Vesuvius in the western outskirts of the city of Naples and the Gulf of Pozzuoli. The IC is present on the subsurface of the entire PON, although it does not outcrop. The IC is associated with a low-permeability tuff horizon, with strong lateral and vertical spatial discontinuity. In the study area, the IC thickness is about one meter, although in other parts of the Campanian plain it can vary from a few meters to 40 m.

Table S1 Legend of cross-section lithologies

|  |                                                                          |
|--|--------------------------------------------------------------------------|
|  | Backfilling material                                                     |
|  | Re-arranged natural topsoil                                              |
|  | Fluvial and lake deposits. ash deposits re-arranged by fluvial transport |
|  | Paleosols                                                                |
|  | Weathered pumice                                                         |
|  | Re-arranged volcanic ash                                                 |
|  | Sandy silt                                                               |

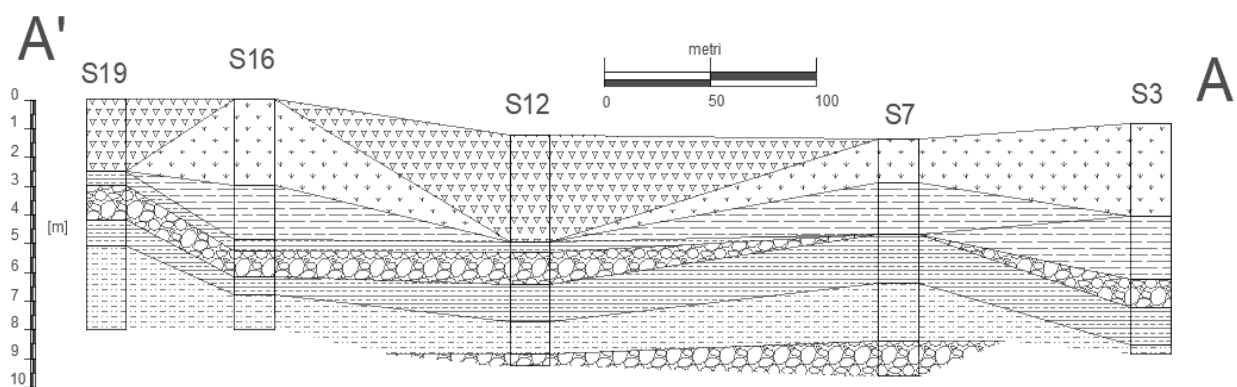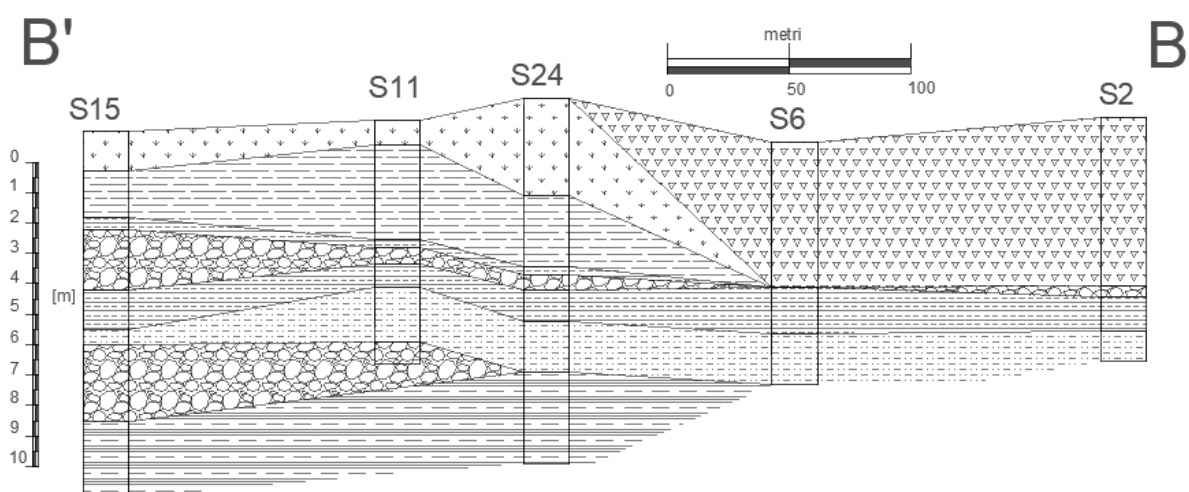

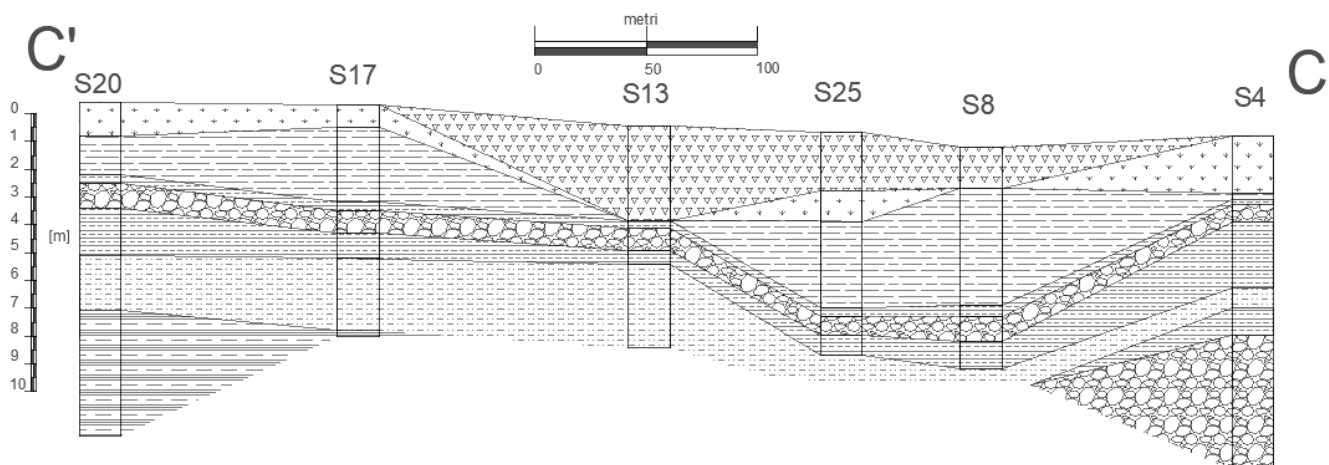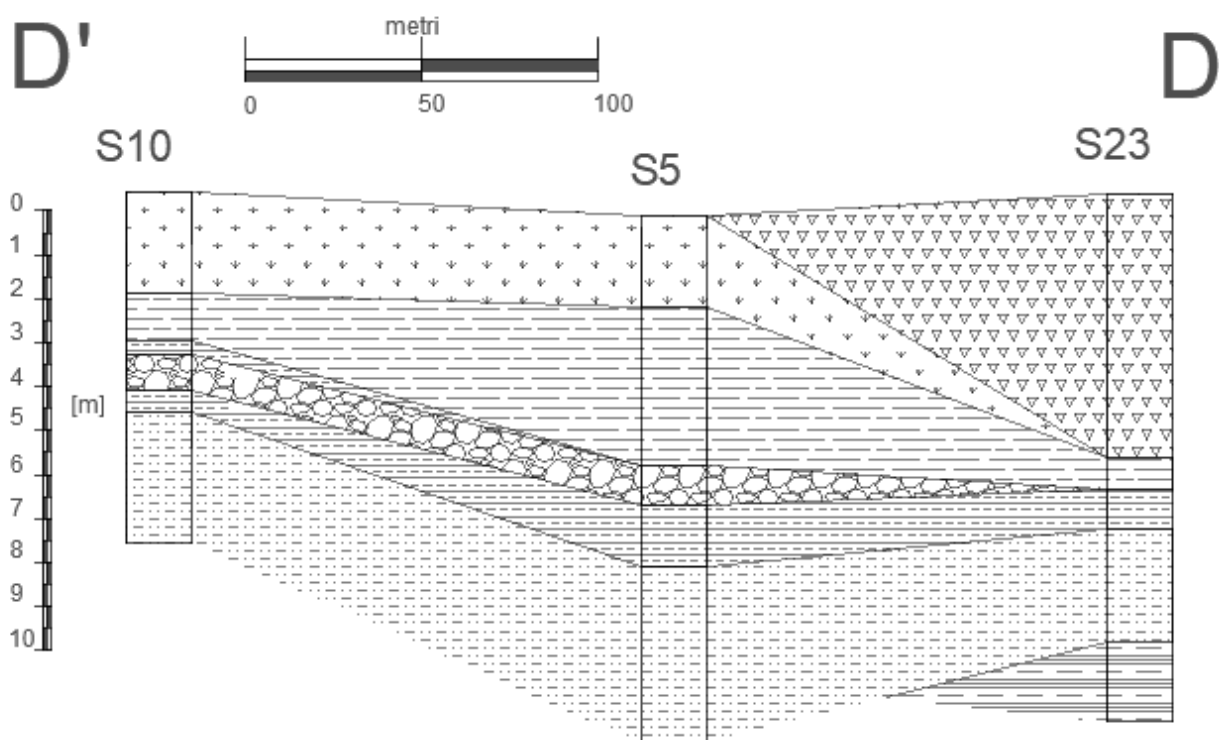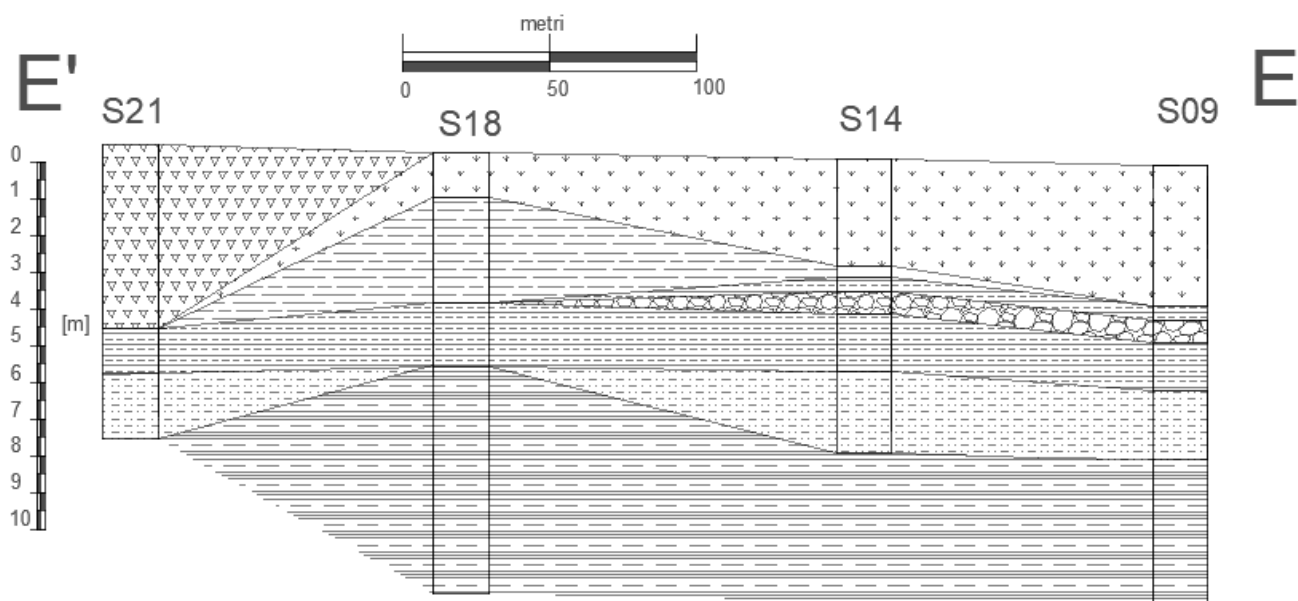

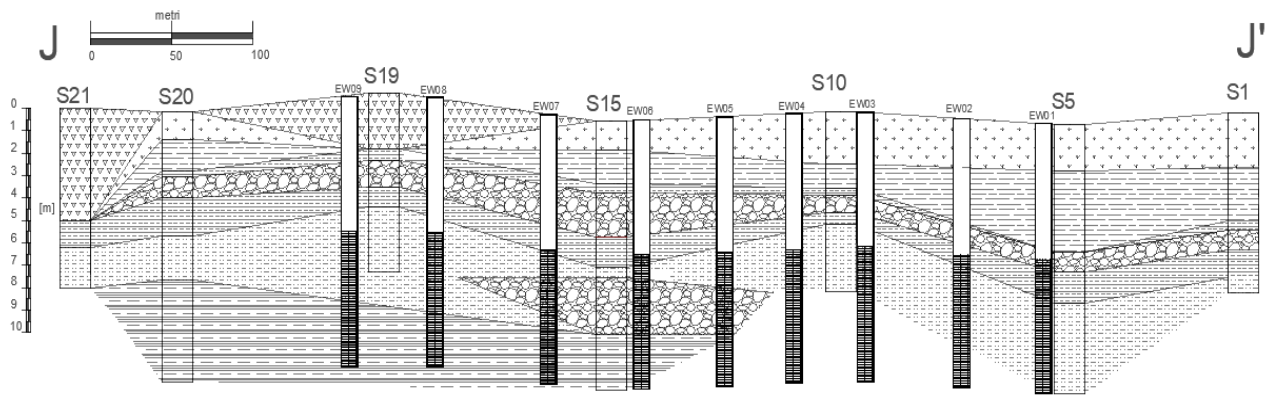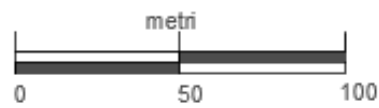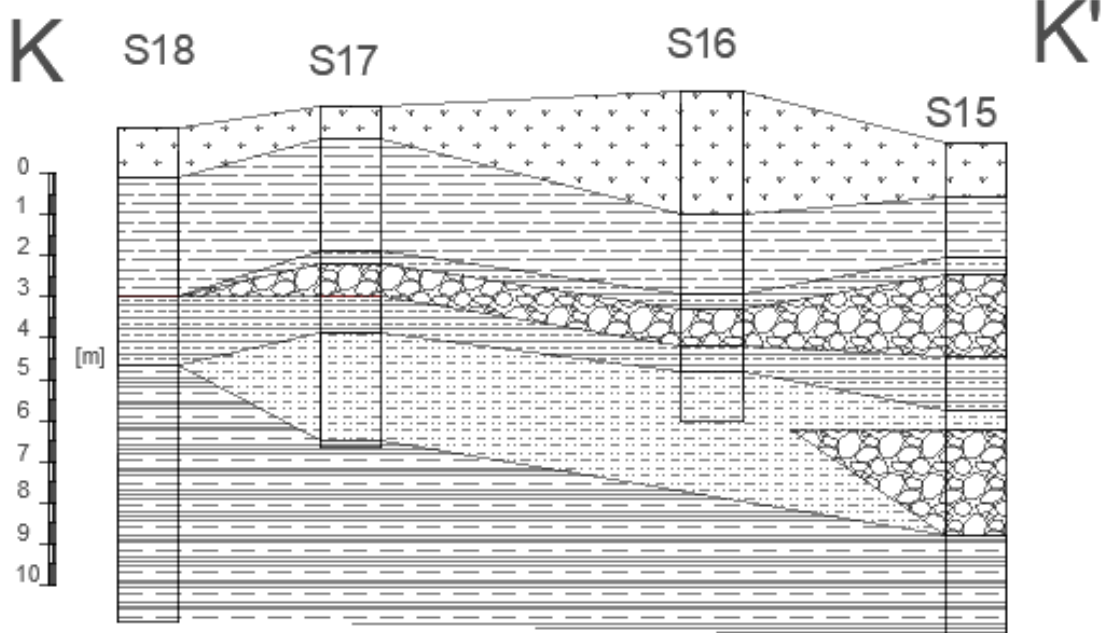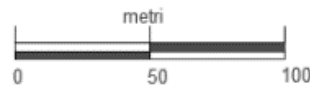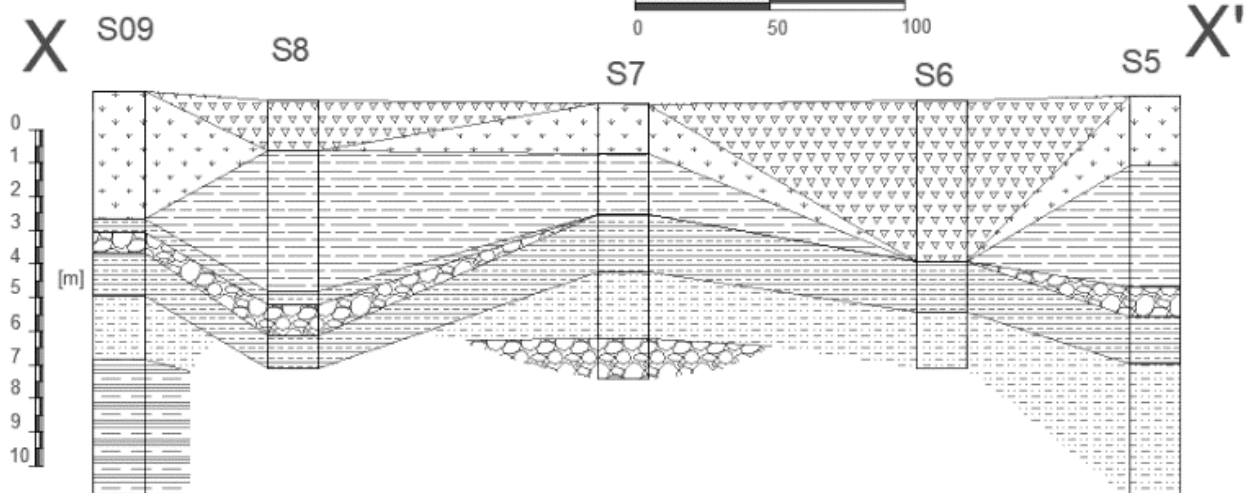

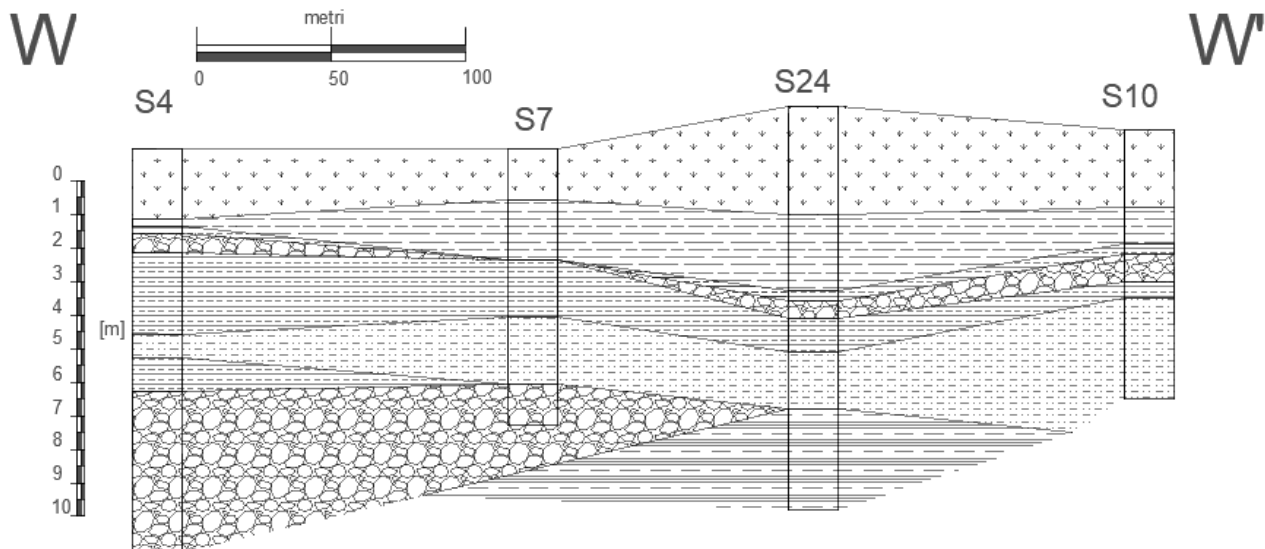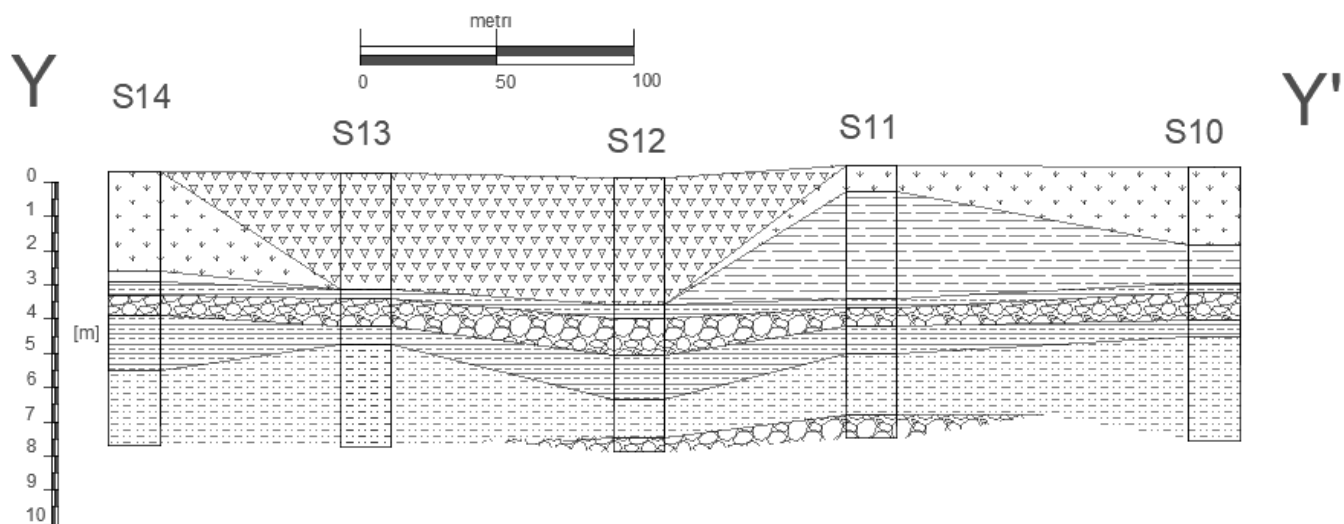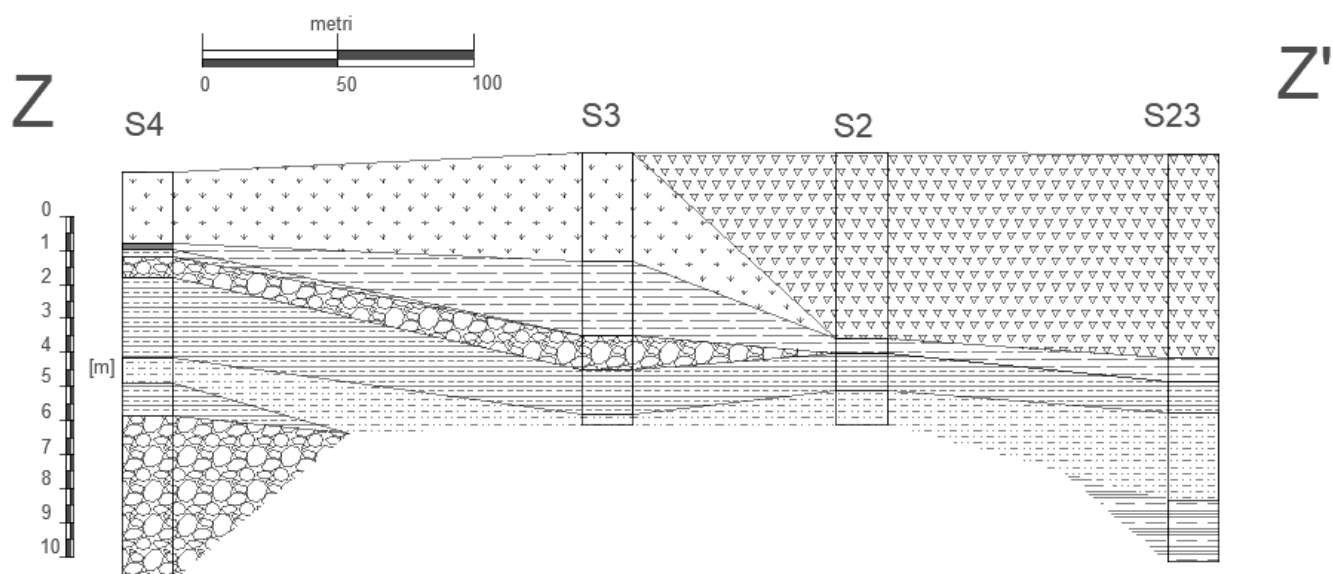

### 3 Interpolated surfaces of the model layers

Table S2 Levels of separation (m) between the layers for each borehole and used to create the interpolated surfaces with ModelMuse 4.3

| Borehole | Number of layer |       |       |       |       |       |       |       |       |       |
|----------|-----------------|-------|-------|-------|-------|-------|-------|-------|-------|-------|
|          | Top             | 1     | 2     | 3     | 4     | 5-8   | 9     | 10    | 11    | 12    |
| S01      | 25.47           | 24.07 | 21.67 | 21.27 | 18.87 | 17.67 | 15.67 | 13.67 | 11.67 | 10.00 |
| S02      | 24.77           | 21.07 | 20.57 | 20.07 | 18.17 | 17.07 | 15.07 | 13.07 | 11.07 | 10.00 |
| S03      | 25.00           | 22.00 | 21.5  | 21.00 | 18.6  | 17.3  | 15.30 | 13.30 | 11.30 | 10.00 |
| S04      | 25.52           | 23.42 | 23.22 | 23.02 | 20.92 | 18.52 | 16.52 | 14.52 | 12.52 | 10.00 |
| S05      | 25.47           | 23.87 | 20.57 | 20.27 | 17.87 | 16.47 | 14.47 | 12.47 | 10.47 | 10.00 |
| S06      | 25.3            | 21.58 | 21.08 | 20.58 | 18.58 | 17.53 | 15.53 | 13.53 | 11.53 | 10.00 |
| S07      | 25.00           | 23.5  | 22.7  | 22.2  | 20.2  | 18.2  | 16.20 | 14.20 | 12.20 | 10.00 |
| S08      | 25.81           | 24.61 | 20.41 | 20.01 | 17.61 | 16.61 | 14.61 | 12.61 | 10.61 | 10.00 |
| S09      | 25.61           | 22.51 | 22.41 | 22.01 | 19.91 | 18.61 | 16.61 | 14.61 | 12.61 | 10.00 |
| S10      | 26.18           | 23.88 | 22.28 | 21.78 | 19.88 | 19.08 | 17.08 | 15.08 | 13.08 | 10.00 |
| S11      | 26.71           | 25.91 | 22.81 | 22.41 | 20.41 | 18.61 | 16.61 | 14.61 | 12.61 | 10.00 |
| S12      | 25.7            | 22.1  | 21.6  | 21.1  | 19.00 | 17.7  | 15.70 | 13.70 | 11.70 | 10.00 |
| S13      | 25.77           | 22.87 | 22.37 | 22.07 | 19.77 | 19.27 | 17.27 | 15.27 | 13.27 | 10.00 |
| S14      | 25.6            | 22.7  | 22.4  | 22.00 | 19.9  | 18.3  | 16.30 | 14.30 | 12.30 | 10.00 |
| S15      | 25.7            | 24.4  | 22.9  | 22.5  | 19.00 | 17.7  | 15.70 | 13.70 | 11.70 | 10.00 |
| S16      | 26.87           | 24.17 | 22.27 | 21.87 | 19.47 | 18.87 | 16.87 | 14.87 | 12.87 | 10.00 |
| S17      | 26.32           | 23.52 | 23.02 | 22.52 | 20.22 | 19.32 | 17.32 | 15.32 | 13.32 | 10.00 |
| S18      | 26.00           | 24.81 | 22.9  | 22.4  | 20.4  | 18.71 | 16.71 | 14.71 | 12.71 | 10.00 |
| S19      | 26.86           | 25.16 | 24.66 | 24.06 | 21.36 | 20.46 | 18.46 | 16.46 | 14.46 | 10.00 |
| S20      | 26.3            | 25.1  | 23.7  | 23.4  | 21.00 | 19.3  | 17.30 | 15.30 | 13.30 | 10.00 |
| S21      | 26.18           | 22.38 | 21.88 | 21.38 | 19.38 | 18.18 | 16.18 | 14.18 | 12.18 | 10.00 |
| S22      | 26.00           | 22.2  | 21.7  | 21.2  | 19.2  | 18.00 | 16.00 | 14.00 | 12.00 | 10.00 |
| S23      | 25.89           | 23.69 | 21.89 | 21.49 | 19.29 | 18.29 | 16.29 | 14.29 | 12.29 | 10.00 |
| S24      | 26.71           | 21.81 | 21.31 | 20.81 | 18.81 | 17.91 | 15.91 | 13.91 | 11.91 | 10.00 |
| S25      | 25.79           | 22.79 | 20.49 | 20.19 | 18.19 | 17.19 | 15.19 | 13.19 | 11.19 | 10.00 |



4 Time-dependent constant-head boundary conditions

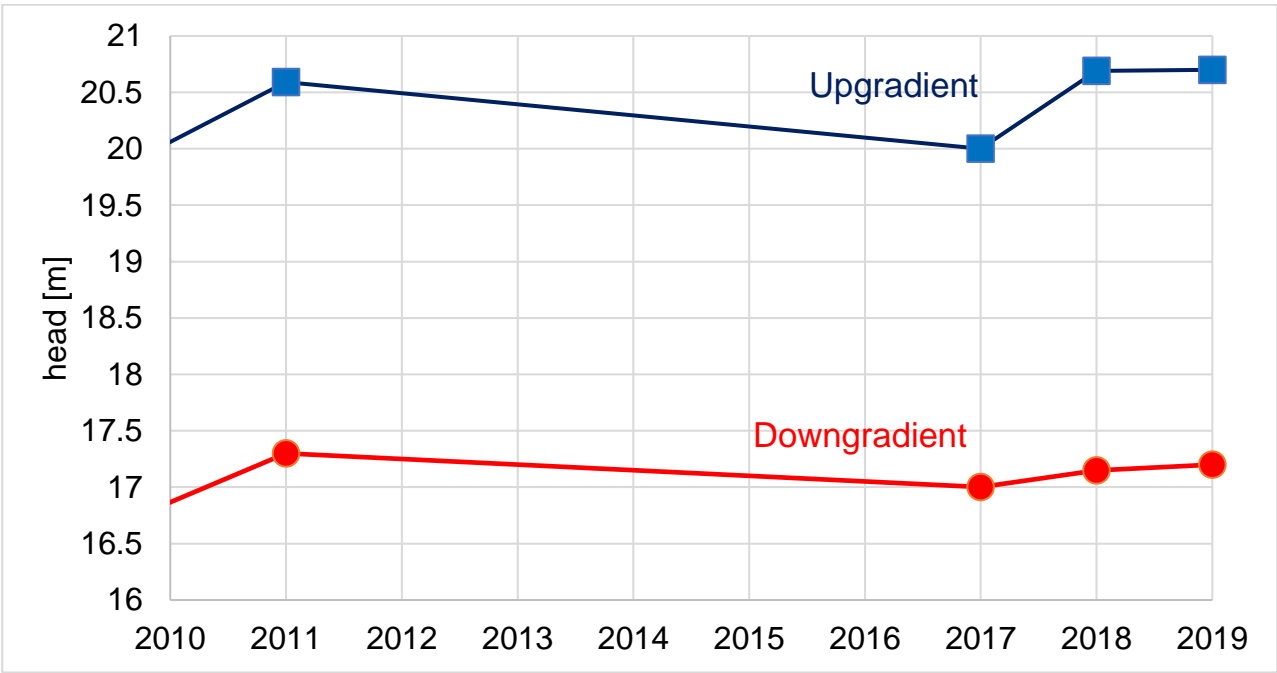

## 5 Pumping rates used in the numerical model

Table S3 Pumping rates, as m<sup>3</sup>/h,

| year | EW01 | EW02 | EW03 | EW04 | EW05 | EW06 | EW07 | EW08 | EW09  |
|------|------|------|------|------|------|------|------|------|-------|
| 2003 | 0    | 0    | 0    | 0    | 0    | 0    | 0    | 0    | 0     |
| 2004 | 0    | 0    | 0    | 0    | 0    | 0    | 0    | 0    | 0     |
| 2005 | 0    | 0    | 0    | 0    | 0    | 0    | 0    | 0    | 0     |
| 2006 | 0.8  | 2.8  | 0.8  | 0.8  | 3.5  | 3.5  | 0.8  | 0.6  | 0.17  |
| 2007 | 0.8  | 2.8  | 0.8  | 0.8  | 3.5  | 3.5  | 0.8  | 0.6  | 0.17  |
| 2008 | 0.8  | 2.8  | 0.8  | 0.8  | 3.5  | 3.5  | 0.8  | 0.6  | 0.17  |
| 2009 | 0.8  | 2.8  | 0.8  | 0.8  | 3.5  | 3.5  | 0.8  | 0.6  | 0.17  |
| 2010 | 1.08 | 2.02 | 0.58 | 2.09 | 1.3  | 2.23 | 1.12 | 0.97 | 0.17  |
| 2011 | 1.08 | 2.02 | 0.58 | 2.09 | 1.3  | 2.23 | 1.12 | 0.97 | 0.17  |
| 2012 | 1.08 | 2.02 | 0.58 | 2.09 | 1.3  | 2.23 | 1.12 | 0.97 | 0.17  |
| 2013 | 1.08 | 2.02 | 0.58 | 2.09 | 1.3  | 2.23 | 1.12 | 0.97 | 0.17  |
| 2014 | 1.08 | 2.02 | 0.58 | 2.09 | 1.3  | 2.23 | 1.12 | 0.97 | 0.125 |
| 2015 | 1.08 | 2.02 | 0.58 | 2.09 | 1.3  | 2.23 | 1.12 | 0.97 | 0     |
| 2016 | 1.08 | 2.02 | 0.58 | 2.09 | 1.3  | 2.23 | 1.12 | 0.97 | 0     |
| 2017 | 1.08 | 2.02 | 0.58 | 2.09 | 1.3  | 2.23 | 1.12 | 0.97 | 0     |
| 2018 | 0.97 | 4.6  | 1.12 | 1.98 | 0.86 | 2.23 | 1.22 | 1.04 | 0     |
| 2019 | 0.97 | 4.6  | 1.12 | 1.98 | 0.86 | 2.23 | 1.22 | 1.04 | 0     |

## 6 Calibration plots and sensitivity analysis

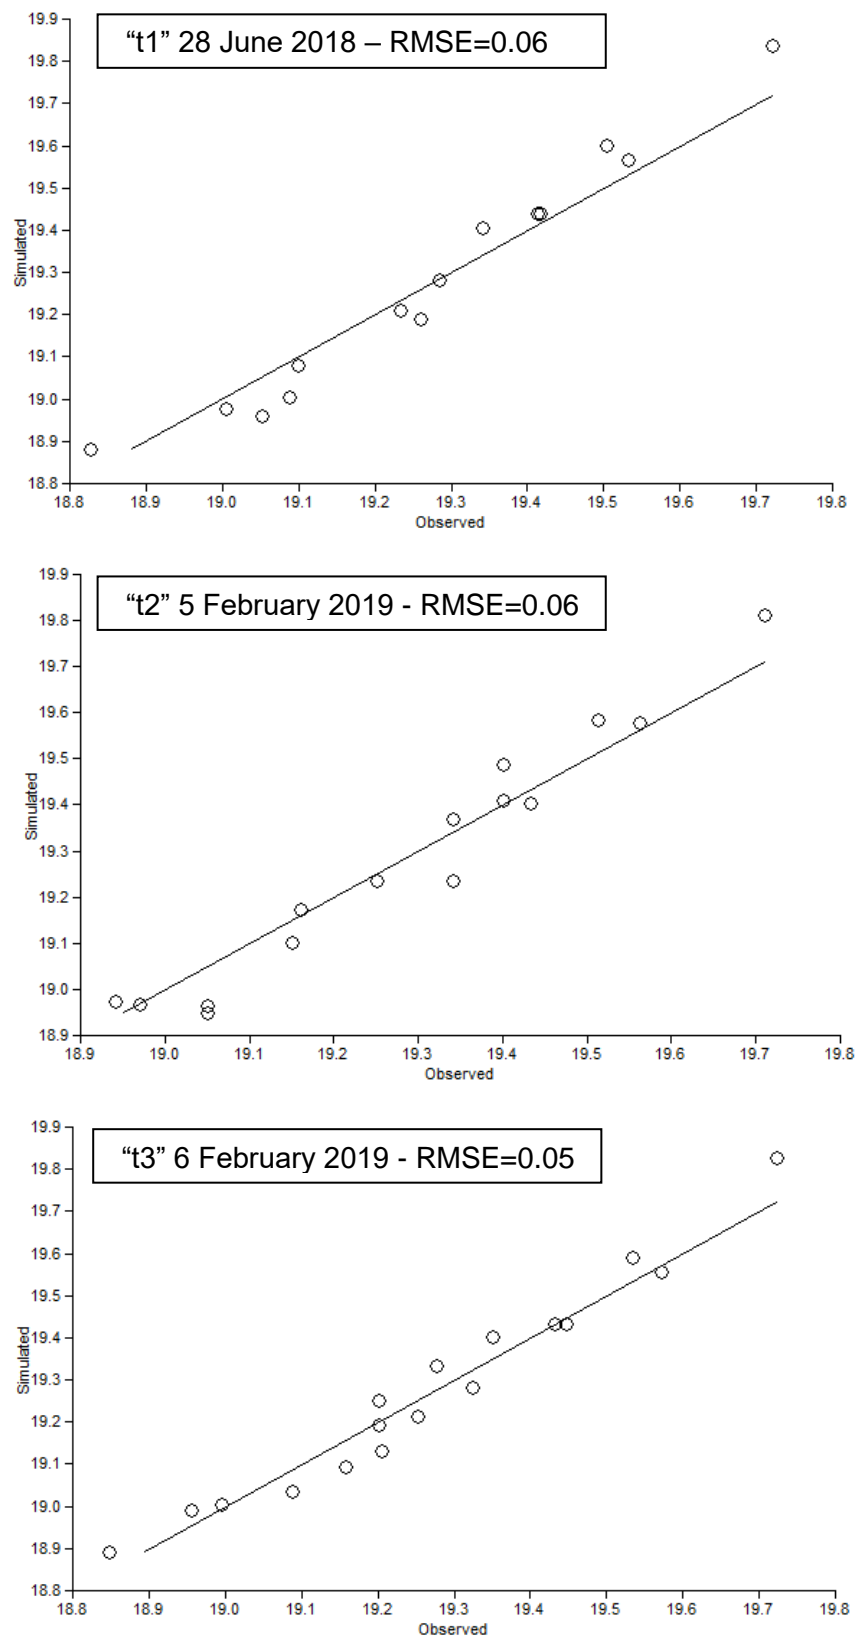

Figure S2 – Calibration of the model for the different datasets.

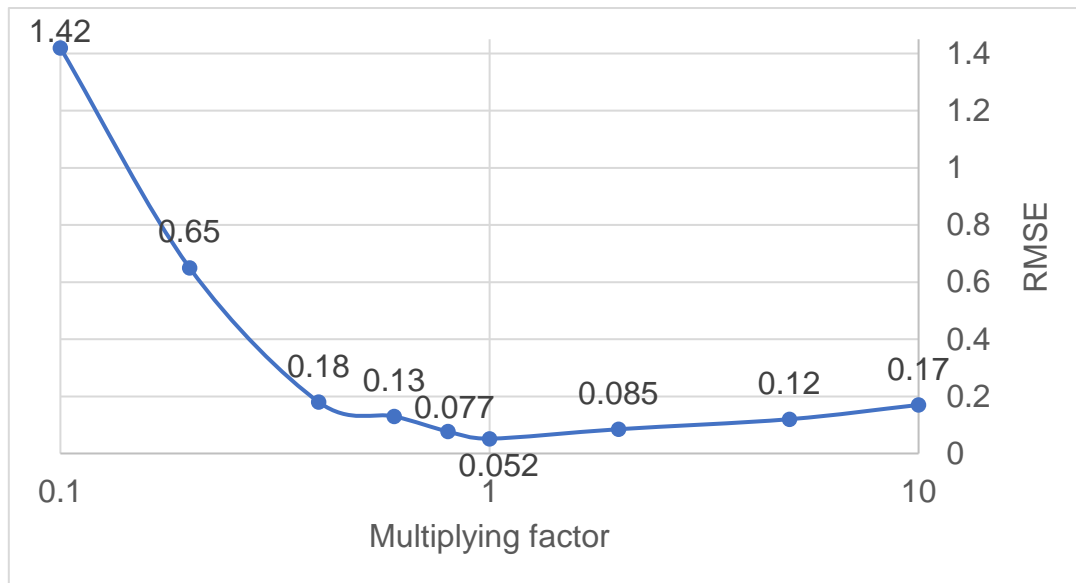

Figure S3 – Sensitivity analysis on parameter “hydraulic conductivity,  $K$ ”, performed on dataset “t3”.
